# Supplementary material for: Ganoderma lucidum Polysaccharides Induce Macrophage-Like Differentiation in Human Leukemia THP-1 Cells via Caspase and p53 Activation
Source: PubMed Central journal article supplement (PMC3135330; doi:10.1093/ecam/nep107), 2011-01-04
Supplement: 358717.f3.pdf [file 358717.f3.pdf]

supplementary Table 3. Significantly genetic networks affected by F3.

| ID                             | Molecules in networks by IPA tool analysis                                                                                                                                                                                                                                                  | Score | Focus Molecules | Top functions                                                                           |
|--------------------------------|---------------------------------------------------------------------------------------------------------------------------------------------------------------------------------------------------------------------------------------------------------------------------------------------|-------|-----------------|-----------------------------------------------------------------------------------------|
| <b>F3 treatment for 6 hrs</b>  |                                                                                                                                                                                                                                                                                             |       |                 |                                                                                         |
| 1                              | <b>CXCL6, DUSP5, G0S2, GBP1, IFI27, IFI35, IFIT3, IFITM1, IL-1R, IL10RA, IL12B, IL1B, IL23A, IRAK, IRF1, IRF2, IRF7, IRF8, ISG15, ISGF3G, KCNAB2, MYD88, OAS1, OAS2, PLSCR1, PSMB9, PYCARD, RSAD2, RTN1, SLC11A2, SQSTM1, STAT1, STAT2, STAT4, UGCG</b>                                     | 50    | 33              | Immune Response<br>Cell Signaling                                                       |
| 2                              | <b>BCL2, BCL2A1, Calcineurin protein(s), CASP1, CASP4, CASP5, CASP7, Caspase, Caspase 3/7, CAT, CCL7, CCR1, CKB, CLIC4, DUSP1, EIF4EBP1, FGR, HIP1, IFI6, IFIH1, IFNGR2, MCL1, MT1E, MTF1, PIM2, PLAUR, PMAIP1, PML, SP100, SPHK1, SRD5A1, STAT3, STK3, TNFAIP2, TNFSF10</b>                | 47    | 32              | Cell Death                                                                              |
| 3                              | <b>BTG3, CASP10, CHST2, ECGF1, EHD1, GBP2 (includes EG:2634), HIVEP1, IFIT5, Ikb, IKBKE, IKK, IL1/IL6/TNF, KYNU, LAMP3, LITAF, LSS, NF-κB, NINJ1, OAS3, OASL, OPTN, peptidase, PLA2G7, RAB8A, RIPK1, SERPINB1, TNF, Tnf receptor, TNFAIP3, TNFAIP8, TNFRSF21, TNIP1, TRADD, TRAF1, WTAP</b> | 40    | 29              | Cell Death                                                                              |
| 4                              | <b>Ahr-aryl hydrocarbon-Arnt, ATF3, BCL6, BIRC3, BTG1, C3AR1, CBFA2T3, CCL8, CYP1B1, DACH1, EHD4, ERK1/2, Fos-Jun, FTH1, GCLM, HESX1, HHEX, HMOX1, JINK1/2, JUN, JUN/JUNB/JUND, JUNB, MAFF, MT2A, MXI1, N-cor, NFE2L2, NFE2L3, NQO1, PDCD4, PLAGL1, PTX3, Rar, RUNX1T1, SLC19A1</b>         | 38    | 28              | Gene Expression<br>Cellular Development<br>Cell Death                                   |
| 5                              | <b>Akt, BCL3, C8, CACYBP, Caspase 8/10, CCR7, CD59, CD70, CFLAR, CXCL2, CXCL3, CXCL9, CXCL13, DDX3X, FAS, HPSE, Hsp27, IER3, IL8, LTB, NFKB1, NFKB2, NFKBIE (includes EG:4794), OLIG2, PDE4B, Pdgf Ab, PEA15, PHLDA1, REL, RUNX3, TCR, TNFR/Fas, TNFRSF9, TNFRSF1B, UXS1</b>                | 38    | 28              | Hematological System Development and Function<br>Immune System Development and Function |
| <b>F3 treatment for 24 hrs</b> |                                                                                                                                                                                                                                                                                             |       |                 |                                                                                         |
| 1                              | <b>ALCAM, AMPD3, BST2, CHST2, ECGF1, ECH1, EHD1, EXT1, GBP2 (includes EG:2634),</b>                                                                                                                                                                                                         | 45    | 31              | Cell Death                                                                              |

|   |                                                                                                                                                                                                                                                                                                                        |    |    |  |                                                                        |
|---|------------------------------------------------------------------------------------------------------------------------------------------------------------------------------------------------------------------------------------------------------------------------------------------------------------------------|----|----|--|------------------------------------------------------------------------|
|   | <b>HNRPA0, IFIH1, IFIT5, IL-1R, IL1/IL6/TNF, IL10RA, IRAK, IRF7, IRF8, ISG15, KYNU, LAMP3, MAFF, MYD88, NINJ1, OAS3, OASL, OPTN, peptidase, PLA2G7, PLSCR1, PMAIP1, SHFM1, TLR7, TNF, UBE1L</b>                                                                                                                        |    |    |  | Hematological System Development and Function<br>Cellular Development  |
| 2 | <b>ABCD3, CD8, CD163, CTSS, G0S2, GBP1, HLA-A, HLA-B, HLA-C, HLA-E, HLA-F, HLA-G, IL1B, IRF1, IRF2, ISGF3G, LILRB1, LILRB2, MHC Class I, MHC I-<math>\alpha</math>, OAS1, OAS2, PROCR, PRTN3, PSMB9, RSAD2, RTN1, SLC11A2, Tap, TAP1, TAP2, TAPBP, TNFSF10, UAP1, UGCG</b>                                             | 45 | 31 |  | Cell Signaling<br>Immune Response<br>Cellular Growth and Proliferation |
| 3 | <b>Akt, CASP10, CAT, CD40, CD83, CFLAR, CXCL13, DKC1, FAS, GRB10, Hsp27, IER3, IKBKE, IL8, IL7R, MUC1, NF-<math>\kappa</math>B, NFKB1, NFKB2, NFKBIA, NFKBIE (includes EG:4794), OLIG2, PROS1, PTAFR, PTPRF, RELB, RET, SQSTM1, TANK, Tnf receptor, TNFAIP3, TNFRSF9, TNFRSF1B, TNIP1, TRAF1</b>                       | 45 | 31 |  | Cell Death                                                             |
| 4 | <b>ARL4C, CD37, CD53, Cyclooxygenase, DDX58, EBI3, ENPP2, GK, HOMER3, IFI27, IFI35, IFIT1, IFIT2, IFITM1, IL6, IL23A, INDO, IRS, ISG20, JAK, PDLIM2, PPAR<math>\alpha</math>-RXR<math>\alpha</math>, PPP1R15A (includes EG:23645), PSCDBP, SEMA4A, SLC7A7, SOCS, SP110, STAT, STAT1, STAT2, STAT4, Timp, TTK, WARS</b> | 38 | 28 |  | Immune Response                                                        |
| 5 | <b>AHR, Ahr-aryl hydrocarbon-Arnt, BMI1, C1q, CCNA1, CDKN1A, CENPF, Cyclin A, Cyclin E, CYP1B1, DHFR, DSE, E2f, E2F8, EID1, IFI16, LGALS3BP, LY96, MYB, PIM1, PNN, PPM1G, PSAP, PTX3, Rb, RBL2, Scf, SKP2, SOD2, Sphk, STMN1, TCF7L2, TFAP2A, TNFAIP6, TOP2A</b>                                                       | 36 | 27 |  | Cell Cycle<br>Cellular Growth and Proliferation                        |

---

\* Bold genes are those determined by microarray analysis and identified by IPA tool. A score of > 3 is considered significant ( $p < 0.001$ )
